# Supplementary material for: High performance plain carbon steels obtained through 3D-printing
Source: PubMed Central journal article supplement — Nat Commun. 2024 Nov 21;15:10077. doi: 10.1038/s41467-024-54507-4 (PMC11582704; doi:10.1038/s41467-024-54507-4), 2024-11-21
Supplement: 41467_2024_54507_MOESM1_ESM.pdf [file 41467_2024_54507_MOESM1_ESM.pdf]

1 Supplementary Information for

2 High performance plain carbon steels obtained through 3D-printing

3 Qiyang Tan<sup>1†</sup>, Haiwei Chang<sup>1†</sup>, Guofang Liang<sup>1</sup>, Vladimir Luzin<sup>2,3</sup>, Yu Yin<sup>1</sup>, Fanshuo Wang<sup>1</sup>, Xing  
4 Cheng<sup>4</sup>, Ming Yan<sup>4</sup>, Qiang Zhu<sup>4</sup>, Christopher Hutchinson<sup>5,\*</sup>, Ming-Xing Zhang<sup>1,\*</sup>

5 <sup>1</sup>School of Mechanical and Mining Engineering, The University of Queensland, QLD 4072, Australia

6 <sup>2</sup>Australian Nuclear Science and Technology Organization (ANSTO), NSW 2234, Australia

7 <sup>3</sup>School of Engineering, The University of Newcastle, Callaghan, NSW 2308, Australia

8 <sup>4</sup>Department of Materials Science and Engineering and Shenzhen Key Laboratory for Additive  
9 Manufacturing of High-performance Materials, Southern University of Science and Technology,  
10 Shenzhen 518055, China

11 <sup>5</sup>Department of Materials Science and Engineering, Monash University, VIC 3800, Australia

12 Corresponding authors: [christopher.hutchinson@monash.edu](mailto:christopher.hutchinson@monash.edu), [mingxing.zhang@uq.edu.au](mailto:mingxing.zhang@uq.edu.au),

13 †These authors contributed equally to this work

14 **Supplementary Section 1. Hardness distributions in 3D-printed 1040 steel.**

15 We conducted hardness test on the 3D-printed 1040 steel. Supplementary Fig. 1 shows the  
16 indentation impressions and Rockwell hardness distributions across the XZ-plane (i.e. longitudinal  
17 plane along the BD) on the 3D-printed 1040 steel. The sample exhibits a comparable indentation  
18 impression size and profile, accompanied by a consistent hardness distribution. This underscores the  
19 homogeneous microstructure achieved in the steel.

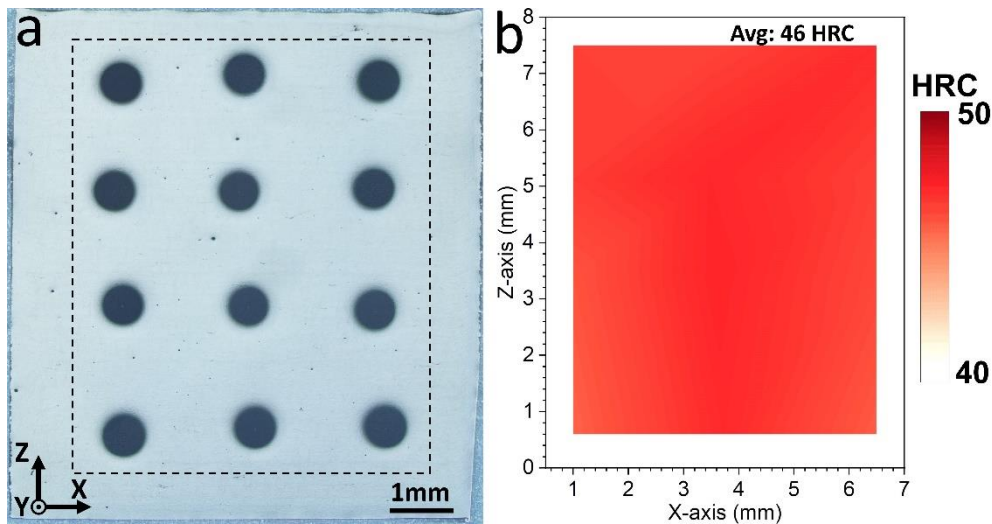

20 **Supplementary Figure 1:** Hardness distribution of 3D-printed 1040 steel. (a) Cross-sectional optical  
21 micrographs of the 3D-printed 1040 steel after Rockwell hardness testing, demonstrating the similar  
22 indentation impressions on each sample. (b) Rockwell hardness profile taken from the marked areas in  
23 (a) showing uniform hardness distribution. Source data are provided as a Source Data file.

25 **Supplementary Section 2. Densification behaviour**

26 This preliminary experiment aims to determine the optimal processing parameter set in order to  
27 obtain the highly dense 3D-printed plain carbon steels. Supplementary Tables 1 and 2 summarize the  
28 3D-printing parameters and their corresponding laser energy densities calculated by  $E = \frac{P}{vht}$ .

29 **Supplementary Table 1:** PBF processing parameters.

| Process parameter and unit                    | Value                                                      |
|-----------------------------------------------|------------------------------------------------------------|
| Laser power, $P$ (W)                          | 100, 125, 150, 175, 200, 225, 250, 275, 300, 325, 350, 375 |
| Scanning speed, $v$ (mm/s)                    | 400, 600                                                   |
| Hatching spacing, $h$ ( $\mu\text{m}$ )       | 120                                                        |
| Layer thickness, $t$ ( $\mu\text{m}$ )        | 30                                                         |
| Preheating temperature ( $^{\circ}\text{C}$ ) | 200                                                        |
| Scanning strategy                             | x/y-raster                                                 |
| Layer rotation angle ( $^{\circ}$ )           | 33                                                         |

30

31 **Supplementary Table 2:** The laser energy density corresponding to each processing parameter set. Note  
 32 that the layer thickness ( $t$ ) and the hatch space ( $h$ ) were fixed at 0.03 mm and 0.12 mm, respectively.

| Process parameter set                     | Laser energy density, $E$ |
|-------------------------------------------|---------------------------|
| $P = 100 \text{ W}, v = 600 \text{ mm/s}$ | 46 J/mm <sup>3</sup>      |
| $P = 125 \text{ W}, v = 600 \text{ mm/s}$ | 58 J/mm <sup>3</sup>      |
| $P = 150 \text{ W}, v = 600 \text{ mm/s}$ | 69 J/mm <sup>3</sup>      |
| $P = 175 \text{ W}, v = 600 \text{ mm/s}$ | 81 J/mm <sup>3</sup>      |
| $P = 200 \text{ W}, v = 600 \text{ mm/s}$ | 93 J/mm <sup>3</sup>      |
| $P = 225 \text{ W}, v = 600 \text{ mm/s}$ | 104 J/mm <sup>3</sup>     |
| $P = 250 \text{ W}, v = 600 \text{ mm/s}$ | 116 J/mm <sup>3</sup>     |
| $P = 275 \text{ W}, v = 600 \text{ mm/s}$ | 127 J/mm <sup>3</sup>     |
| $P = 300 \text{ W}, v = 600 \text{ mm/s}$ | 139 J/mm <sup>3</sup>     |
| $P = 325 \text{ W}, v = 600 \text{ mm/s}$ | 150 J/mm <sup>3</sup>     |
| $P = 350 \text{ W}, v = 600 \text{ mm/s}$ | 162 J/mm <sup>3</sup>     |
| $P = 375 \text{ W}, v = 600 \text{ mm/s}$ | 173 J/mm <sup>3</sup>     |
| $P = 350 \text{ W}, v = 400 \text{ mm/s}$ | 243 J/mm <sup>3</sup>     |
| $P = 375 \text{ W}, v = 400 \text{ mm/s}$ | 260 J/mm <sup>3</sup>     |

33

34 As seen in Supplementary Fig. 2, Samples with insufficient energy density ( $\leq 45 \text{ J/mm}^3$ ) were  
 35 featured with high fractions of pores, which could be ascribed to the lack of fusion <sup>2</sup>. The sample density  
 36 increased constantly with increasing the energy density. For both steels, there were wide energy density  
 37 window, (i.e. 69-174 J/mm<sup>3</sup> for the 1040 steel and 69-150 J/mm<sup>3</sup> for the 1080 steel), of which the pores  
 38 were virtually eliminated, achieving near-full densification (99.8%). However, further increasing the  
 39 energy beyond these ranges was associated with excessive energy input, which caused high porosity in  
 40 both steels presumably due to the keyhole formation <sup>2</sup>. Such broad processing windows for optimal  
 41 densification demonstrates the remarkable 3D-printability of plain carbon steels.

42 The hardness of the investigated steels is influenced by the laser energy inputs, with discrepancies  
 43 arising from changes in cooling rates tied to different energy levels. Notably, reduced energy input is  
 44 linked to faster cooling rates during melt pool solidification <sup>3</sup>. As a result, variations in processing  
 45 parameters yield distinct phase compositions and microstructural features, and properties suited to  
 46 specific applications as demonstrated in Figs. 2-4 in the main text.

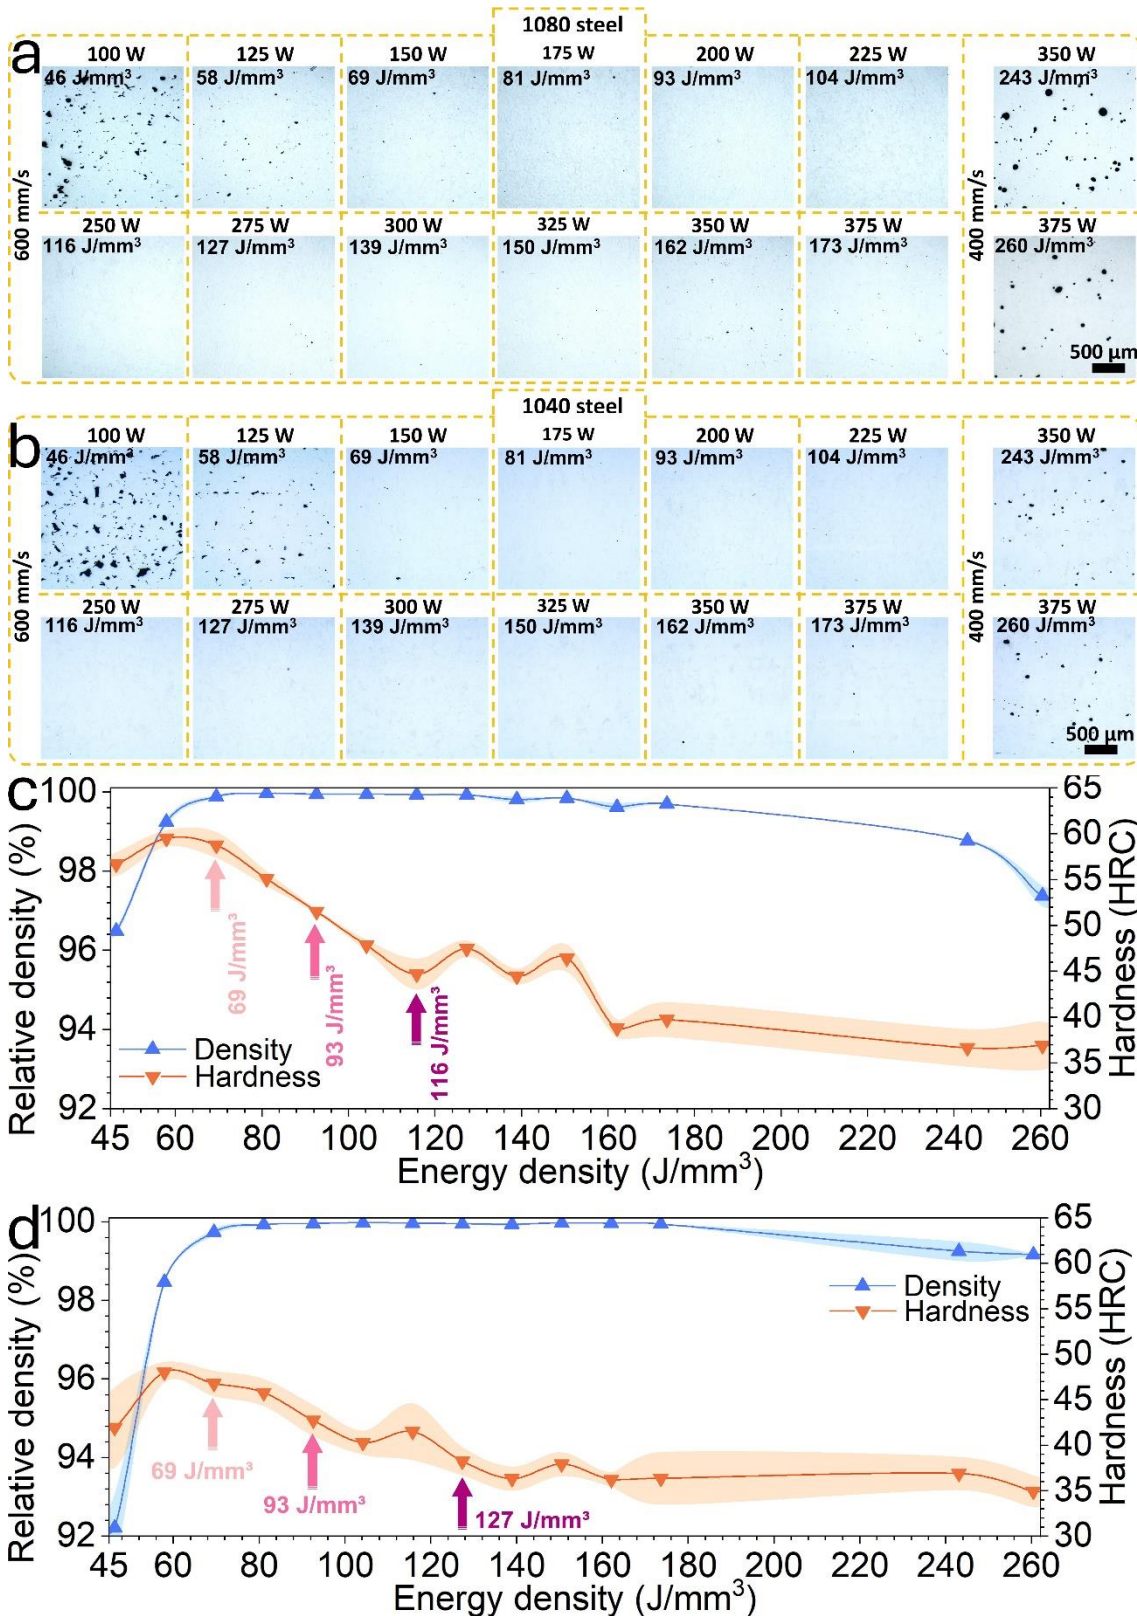

47  
 48 **Supplementary Figure 2:** *Densification behaviours and hardness of the 3D-printed (a, c) 1080 steel*  
 49 *and (b, d) 1040 steel at various processing parameters: (a, b) Longitudinal optical micrographs of*  
 50 *samples with different laser powers, (c, d) the overall sample density and hardness as a function of the*  
 51 *volumetric energy density. The arrows in (c) and (d) pinpoint the three chosen samples for each steel*  
 52 *subjected to microstructural characterizations and property validation. Source data are provided as a*  
 53 *Source Data file.*

54 **Supplementary Section 3. Orientation relationship between  $\alpha'$ -blocks and prior  $\gamma$  grain**

55 The orientations of the  $\alpha'$ -blocks within a single prior austenite grain was examined using electron  
 56 backscattered diffraction (EBSD) pole figures as shown in Supplementary Fig. 3. For all 3D-printed  
 57 1080 steels, the shapes of “three-fold-stars” are revealed in the  $\{110\}$  pole figures. The sides of these  
 58 “three-fold-stars” are clearly warped, possessing 18 intensity maxima. This suggests the approximated  
 59 Greninger-Troiano orientation relationship (i.e.  $\{110\}_{\alpha'} \parallel \{111\}_{\gamma}$ ,  $\langle 5\ 12\ 17 \rangle_{\alpha'} \parallel \langle 7\ 17\ 17 \rangle_{\gamma}$ )  
 60 between the  $\alpha'$ -blocks and the prior  $\gamma$  grains in these steels<sup>4</sup>.

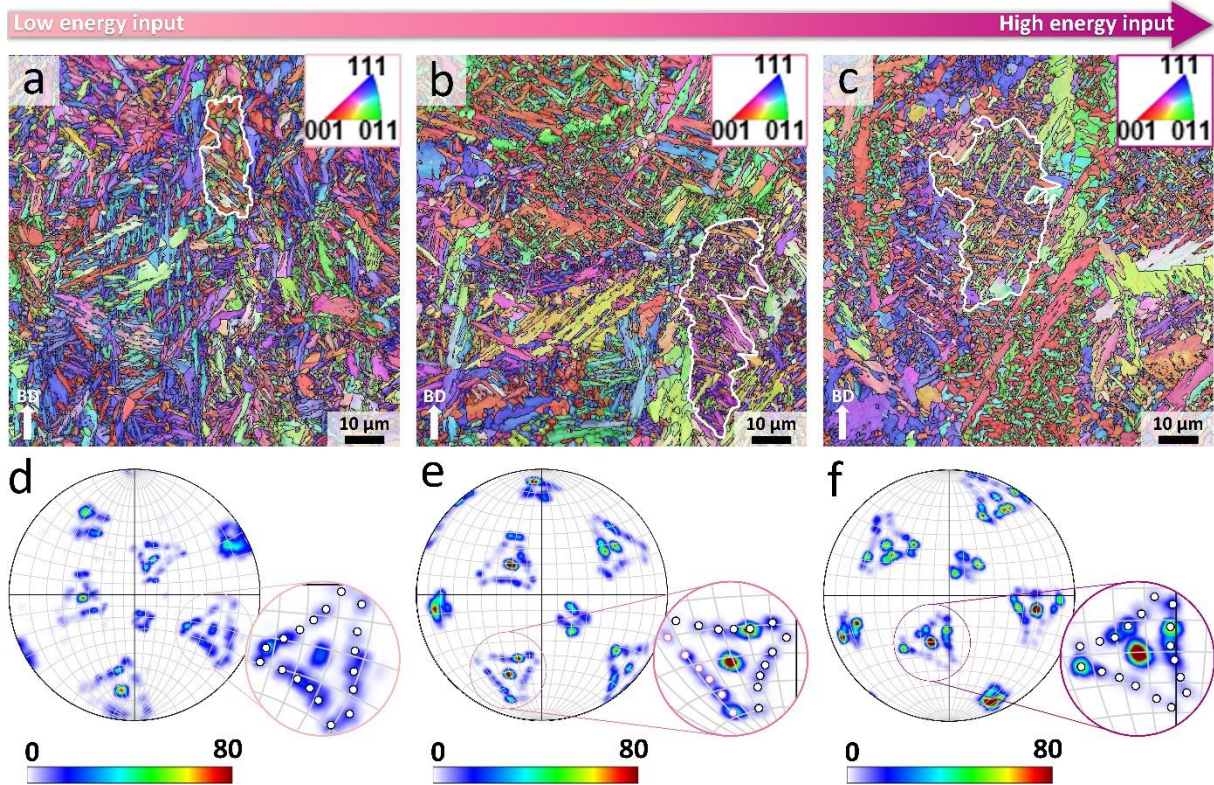

61  
 62 **Supplementary Figure 3: EBSD pole figures analysis.** (a-c) EBSD-IPF maps of the 3D-printed AISI  
 63 1080 steels with various laser energy inputs of (a) 69 J/cm<sup>3</sup>, (b) 93 J/cm<sup>3</sup> and (c) 116 J/cm<sup>3</sup>, and (d-e)  
 64 the contoured  $\{110\}$  pole figures, showing the  $\alpha'$ -block orientations within prior austenite grains  
 65 marked by the white line in (a-c). The relative intensity of the diffraction peaks are indicated by the  
 66 colour scale and the 18 intensity maxima on the sides of typical “three-fold-stars” are marked by the  
 67 solid dots.

68 **Supplementary Section 4. High-resolution TEM characterization on the low-energy-**  
 69 **produced 1080 steel**

70 Supplementary Fig. 4a shows the high-resolution TEM image taken across the  $\alpha'$ -Fe/carbide  
 71 interface in the bainite region. The atomic configurations provide direct evidence confirming the carbide  
 72 to be  $\theta$ -Fe<sub>3</sub>C. The corresponding fast Fourier transforming (FFT) confirms a well-established  
 73 orientation relationship between these two phases<sup>5</sup>:

74 
$$[011]_{\alpha'} \parallel [101]_{\theta}, (\bar{2}1\bar{1})_{\alpha'} \parallel (30\bar{3})_{\theta}$$

75 Supplementary Fig. 4b shows the high-resolution TEM image across the boundary between the  $\alpha'$ -  
 76 matrix and  $\alpha'$ -twin in the martensite region. The atomic arrangement reveals the presence of the  $\omega$ -Fe  
 77 phase along the twin boundary, spanning several atomic layers with fully coherency with the adjacent  
 78  $\alpha'$ -Fe phase. The atomic arrangement of this twinning structure agrees well with previously simulated  
 79 results<sup>5-7</sup>.

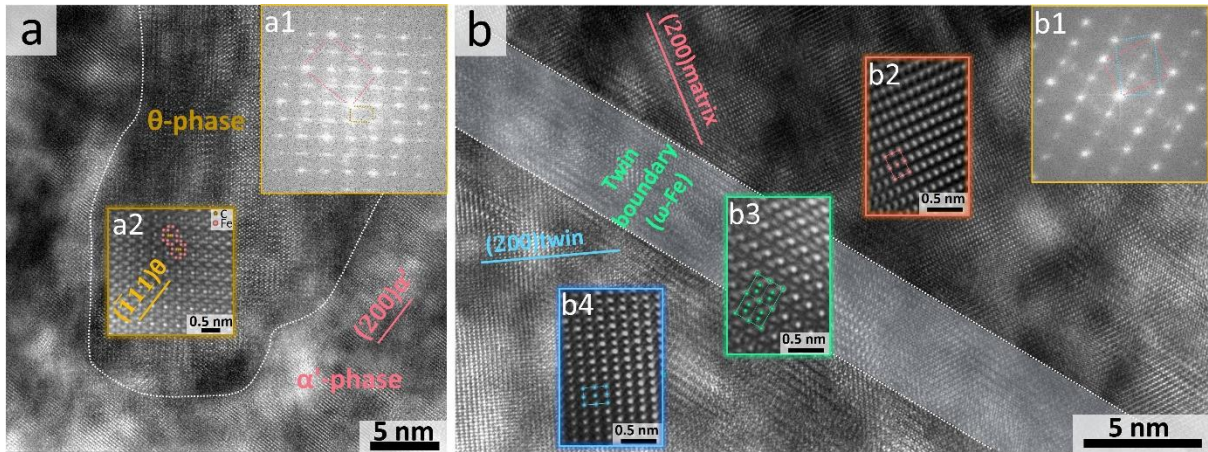

80  
81 **Supplementary Figure 4:** High-resolution TEM images of (a) the  $\alpha'$ -Fe/carbide interface in a bainite  
82 region and (b) the twin boundary in a martensite region taken along the  $[011]_{\alpha'}$  zone axis, with the  
83 insets showing (a1 and b1) the corresponding FFT patterns and (a2, b2-b4) the atomic configurations  
84 of the (a2)  $\theta$ -Fe<sub>3</sub>C, (b2)  $\alpha'$ -matrix, (b3)  $\omega$ -Fe and (b4)  $\alpha'$ -twin.

85 **Supplementary Section 5. TEM characterization on the high-energy-produced 1080 steel**

86 TEM characterization was conducted on the 1080 steel produced with high laser energy input of  
87 116 J/mm<sup>3</sup>. As evident from Supplementary Fig. 5, all the  $\alpha'$ -blocks are interspersed with copious  $\theta$ -  
88 Fe<sub>3</sub>C, manifesting as either needles or particulates (Supplementary Figs. 5b and e). Indexing the  
89 corresponding diffraction patterns (Supplementary Figs. 5c and f) further confirms the following  
90 orientation relationships between the  $\alpha'$ - and the  $\theta$ -Fe<sub>3</sub>C, which have been frequently reported in carbon  
91 steels<sup>8-10</sup>:

92 
$$[111]_{\alpha'} \parallel [311]_{\theta}, (10\bar{1})_{\alpha'} \parallel (\bar{1}03)_{\theta}$$

93 
$$[001]_{\alpha'} \parallel [01\bar{1}]_{\theta}, (\bar{1}\bar{1}0)_{\alpha'} \parallel (022)_{\theta}$$

94 These are different formats of the Isaichev and the Bagaryatskii orientation relationships, respectively  
95 <sup>11,12</sup>. This finding corroborates the bainite-dominant microstructure observed in the sample, aligning  
96 with its elevated BC value (Fig. 2g in the main text).

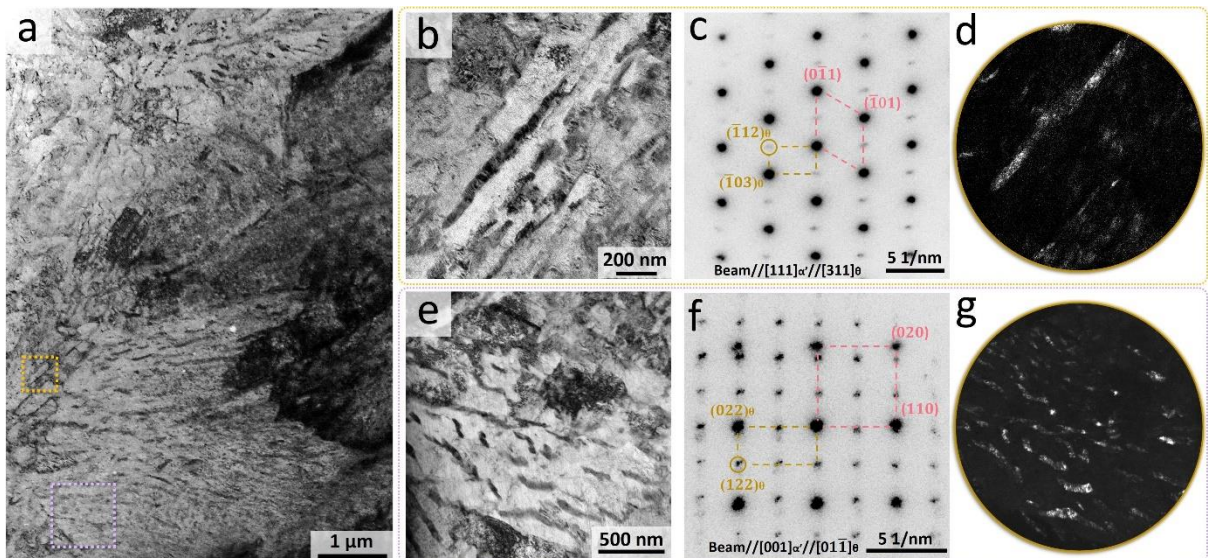

97  
98 **Supplementary Figure 5:** TEM characterization of the 1080 steel produced with high laser energy  
99 input of 116 J/mm<sup>3</sup>. (a) Bright-field TEM micrograph showing the bainite-dominant microstructure in  
100 this sample. (b, e) The higher magnified TEM image of the areas marked in (a), taken close to the

101  $[111]_{\alpha'}$  and  $[001]_{\alpha'}$  zone axes, respectively. They shows (b) the needle shaped carbide and (e) the  
 102 carbide nanoparticles in bainite blocks, respectively. (c, f) the associated diffraction pattern of (b) and  
 103 (e), respectively, with the electron beam aligned along the  $[111]_{\alpha'}$  and  $[001]_{\alpha'}$  zone axes, respectively.  
 104 (d, g) Dark-field TEM images taken from the diffraction spots marked in (c) and (f), respectively.

### 105 Supplementary Section 6. TEM characterization on the high-energy-produced 1040 steel

106 TEM characterization was conducted on the 1040 steel produced with high laser energy input of  
 107  $127 \text{ J/mm}^3$ . As shown in Supplementary Fig. 6, unlike the nanostructured bainite formed in the low-  
 108 energy-produced sample, bainite formed in the high-energy-produced sample contains coarser  $\theta\text{-Fe}_3\text{C}$   
 109 manifesting as either needles or particulates, even though the  $\alpha'$ -laths are still at nanometre scale  
 110 (Supplementary Figs. 6b and e). Indexing the corresponding diffraction patterns (Supplementary Figs.  
 111 6c and f) further confirms the following orientation relationships between the  $\alpha'$  and the  $\theta\text{-Fe}_3\text{C}$ , which  
 112 have been frequently reported in carbon steels<sup>10,11,13</sup>.

$$113 \quad [011]_{\alpha'} \parallel [101]_{\theta}, (\bar{2}1\bar{1})_{\alpha'} \parallel (30\bar{3})_{\theta}$$

$$114 \quad [001]_{\alpha'} \parallel [01\bar{1}]_{\theta}, (\bar{1}\bar{1}0)_{\alpha'} \parallel (022)_{\theta}$$

115 These are different formats of the Isaichev and the Bagaryatskii orientation relationships, respectively  
 116 <sup>11,12</sup>. This finding evidences the bainite-dominant microstructure, aligning with its elevated BC value as  
 117 shown by Fig. 3g in the main text.

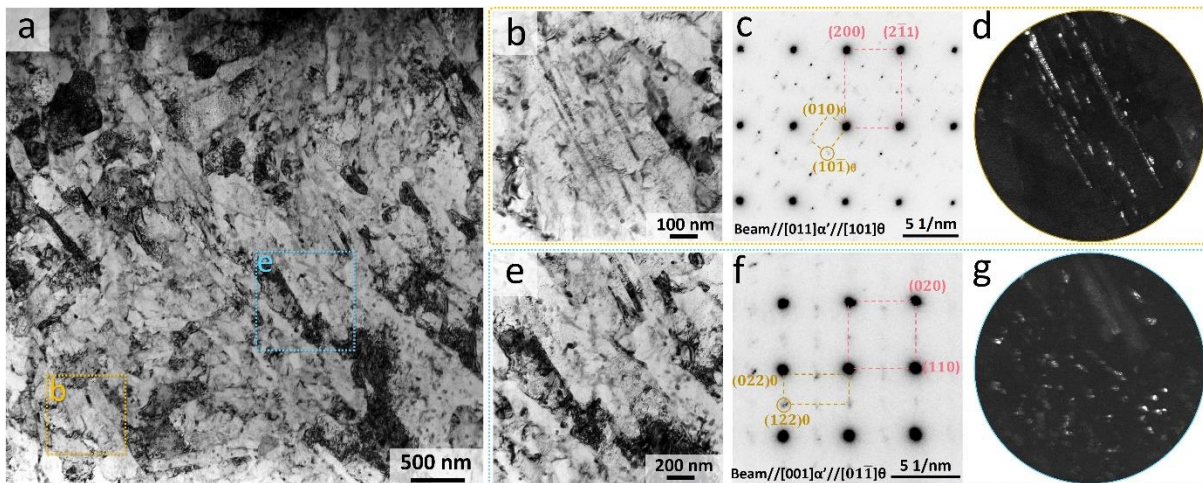

118  
 119 **Supplementary Figure 6:** TEM characterization of the 1040 steel produced with high laser energy  
 120 input of  $127 \text{ J/mm}^3$ . (a) Bright-field TEM micrograph showing the bainite-dominant microstructure in  
 121 this sample. (b, e) The higher magnified TEM image of the areas marked in (a), taken close to the  
 122  $[011]_{\alpha'}$  and  $[001]_{\alpha'}$  zone axes, respectively. They shows (b) the needle shaped carbide and (e) the  
 123 carbide nanoparticles in bainite blocks. (c, f) the associated diffraction pattern of (b) and (e), with the  
 124 electron beam aligned along the  $[011]_{\alpha'}$  and  $[001]_{\alpha'}$  zone axes, respectively. (d, g) Dark-field TEM  
 125 images taken from the diffraction spots marked in (c) and (f), respectively.

126 Our microstructural observations indicate that the cooling trajectory during 3D-printing effectively  
 127 bypasses the pearlite formation region of the 1040 steel, ensuring steel hardening at a broad processing  
 128 window. However, achieving a martensite-dominant microstructure in 1040 steel proves more  
 129 challenging than in 1080 steel, despite the use of low energy inputs. This could be ascribed to the lower  
 130 carbon content of 1040 steel, which advances the start of bainitic transformation curve, causing an  
 131 inevitable intersection with the cooling trajectory at low temperatures. Nevertheless, the fast cooling  
 132 rate associated with the low energy input allows the formation of nano-sized bainitic laths, akin to those  
 133 in the recent advocated nano-bainitic steel that commonly requires precise composition design<sup>14-17</sup>.

134 Furthermore, such bainitic microstructure distinguishes itself by hosting nano-scale, metastable  $\omega'$ -  
 135 carbides rather than the high fraction of coarser needle or particulate carbides typical of conventional  
 136 bainite<sup>18</sup>. This suggests the suppression of cementite precipitation by rapid cooling and substantial  
 137 remaining carbon supersaturation within the bainitic  $\alpha'$ -laths. Thus, a good strength-ductility-toughness  
 138 synergy is achieved in this steel as evidenced by our mechanical testing (Fig. 4 in the main text).

### 139 **Supplementary Section 7. Effect of tempering on the microstructure of 3D-printed 1080** 140 **steel**

141 TEM characterization was conducted on the low-energy-produced 1080 steel (69 J/mm<sup>3</sup>) after  
 142 tempering at 300 °C and 350 °C for 2 hours. In contrast to the nano-twined substructure in the as-printed  
 143 sample, tempering at 300 °C initiates the detwinning and carbon desaturation. As exemplified in  
 144 Supplementary Fig. 7a, the  $\alpha'$ -lath in the sample tempered at 300 °C only consists of a few  $\{112\} <$   
 145  $111 >$  – type twins, corroborated by the diffraction pattern (Supplementary Fig. 7b) and dark-field  
 146 TEM image (Supplementary Fig. 7c). Localized electron diffraction analysis within the  $\alpha'$ -matrix  
 147 unveils additional weak diffraction spots that belong to  $\omega'$ -carbide. These carbides exhibit several to  
 148 tens of nanometres in size, distributing mainly along the twin boundaries, as confirmed by the  
 149 corresponding dark-field TEM image shown in Supplementary Fig. 7e. Moreover, the atomic  
 150 configuration of the  $\omega'$ -carbide (Supplementary Fig. 7h) is highly consistent with the structure of  $\omega'$ -  
 151 Fe<sub>3</sub>C along its [001] axis proposed by Ping et al.<sup>5,19,20</sup>. Indexing the corresponding FFT pattern  
 152 (Supplementary Fig. 7f) according to the  $\omega'$ -Fe<sub>3</sub>C model suggests the OR between  $\alpha'$  and  $\omega'$  as follows:

$$153 \quad [011]_{\alpha'} \parallel [100]_{\omega'}, (0\bar{1}1)_{\alpha'} \parallel (012)_{\omega'}$$

154 Recent studies have demonstrated that  $\omega'$ -phase is a precursor to the stable  $\theta$ -Fe<sub>3</sub>C cementite, evolving  
 155 from the interfacial-twin-boundary  $\omega$ -phase upon tempering<sup>5,19</sup>. The identification of this metastable  
 156 phase, along with the partially detwinned features displayed in Supplementary Fig. 7 underscore the  
 157 partially tempered nature of the 1080 steel at this temperature.

158 Increasing the temperature to 350 °C led to a fully tempered microstructure where all  $\alpha'$  laths are  
 159 devoid of twinning but replete with a dense distribution of nano-sized carbides manifesting  
 160 predominantly as needles or discrete particles (Supplementary Figs. 8a, b and d). Supplementary Figs.  
 161 8c-g shows the selected area diffraction pattern captured from a single  $\alpha'$ -lath alongside a high-  
 162 resolution TEM image taken across the  $\alpha'$ -Fe/carbide interface. Indexing the diffraction pattern and the  
 163 atomic arrangements furnishes direct evidence confirming the carbide as the stable  $\theta$ -Fe<sub>3</sub>C phase. The  
 164 corresponding dark-field TEM image also evidences that most of the  $\theta$ -phase particles possess a  
 165 preferential alignment relative to the  $\alpha'$ -lath, indicating their nucleation along the pre-existing twin  
 166 boundaries. This observation aligns with the recognized pathway for cementite precipitation (i.e.  $\omega \rightarrow$   
 167  $\omega' \rightarrow \theta' \rightarrow \theta$ ) that initiates from the interfacial-twin-boundary  $\omega$ -phase<sup>20</sup>. Moreover, we also observed  
 168 the following orientation relationship between the  $\alpha'$  and the  $\theta$ -Fe<sub>3</sub>C, which is a different format of the  
 169 Bagaryatskii orientation relationship<sup>12</sup> and has previously reported in tempered martensitic steels<sup>21</sup>:

$$170 \quad [111]_{\alpha'} \parallel [010]_{\theta}, (2\bar{1}\bar{1})_{\alpha'} \parallel (002)_{\theta}$$

171 The microstructure we observed here indicates the occurrence of detwinning and carbon  
 172 desaturation in the 3D-printed 1080 steel upon tempering. Such a microstructural evolution is attributed  
 173 to the thermally induced carbon redistribution, dislocation rearrangement and annihilation, and  
 174 migration of twin boundaries facilitated by the transition from metastable  $\omega$ -Fe into stable  $\theta$ -Fe<sub>3</sub>C/ $\alpha$ -Fe  
 175 <sup>5,19,20,22,23</sup>. The transformation of nano-twined, high-carbon martensite to lath martensite interspersed  
 176 with nano-cementite is anticipated to provide a higher resistance against crack initiation and  
 177 propagation, offering increased toughness and ductility. This hypothesis is substantiated by our  
 178 mechanical testing as discussed in the next session.

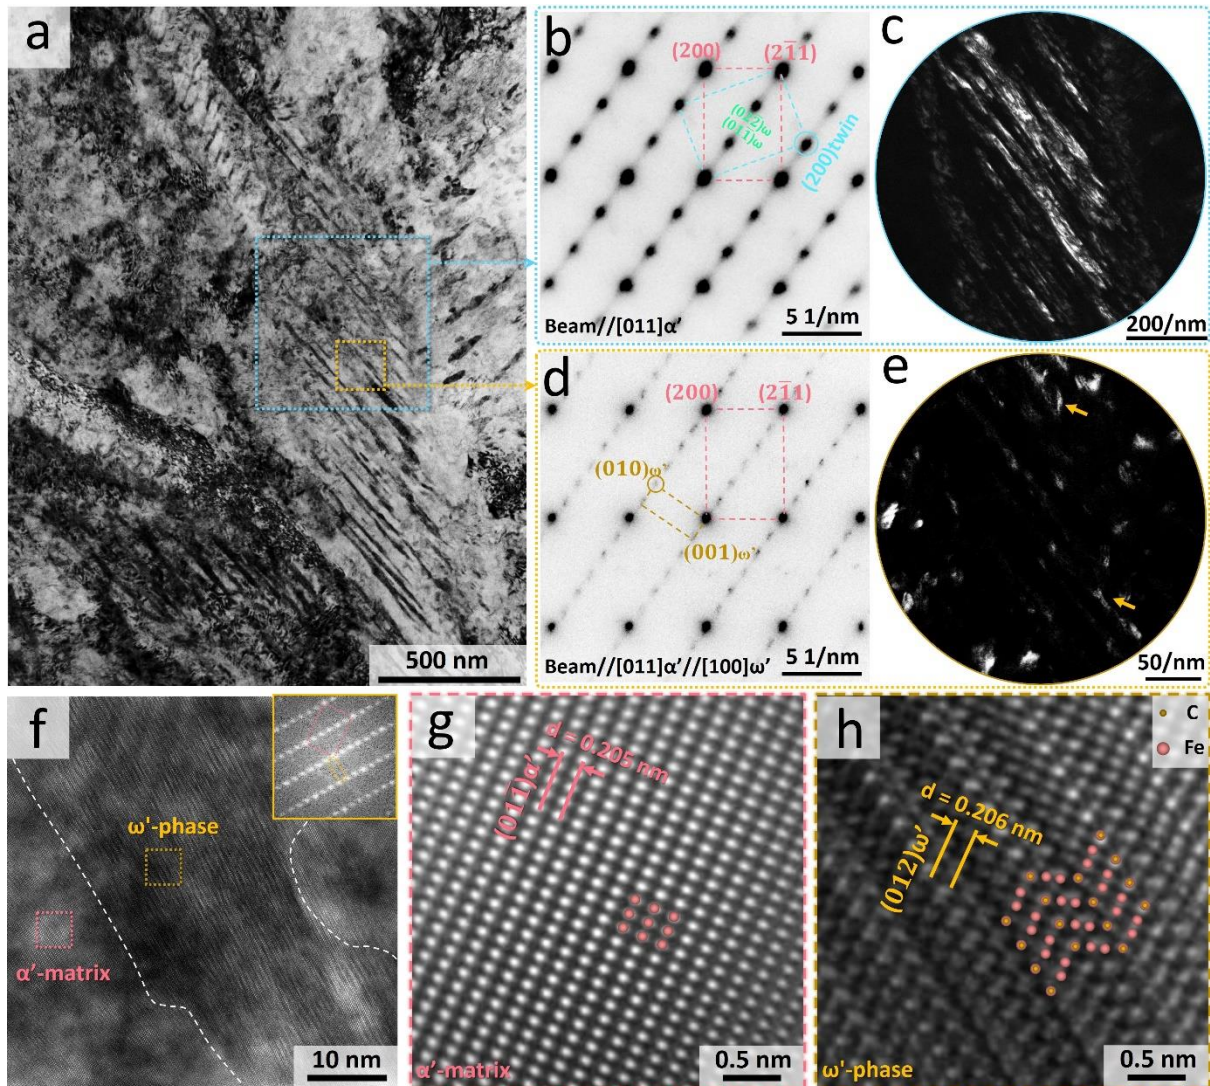

179

180 **Supplementary Figure 7:** TEM characterization of the low-energy-produced 1080 steel ( $69 \text{ J/mm}^3$ )  
 181 after tempering at  $300 \text{ }^\circ\text{C}$  for 2 hours. (a) Bright-field TEM micrograph showing partial detwinning in  
 182 lath martensite microstructure. (b) Diffraction pattern of the areas marked in (a), with the electron  
 183 beam aligned along the  $[011]_{\alpha'}$  axis, showing the typical  $\{112\} \langle 111 \rangle$  - type twinning in the  $\alpha'$ -lath.  
 184 (c) Localized diffraction pattern taken at the untwinned  $\alpha'$ -matrix, showing the existence of extra spots  
 185 that belongs to the  $\omega'$ - $\text{Fe}_3\text{C}$  phase. (c, e) Dark-field TEM images taken from the diffraction spot marked  
 186 in (b) and (d), respectively. The arrows marked in (e) shows indicates the  $\omega'$ - $\text{Fe}_3\text{C}$  nanoparticles along  
 187 the twin boundaries. (f) High-resolution TEM images of the  $\alpha'$ -Fe/ $\omega'$ - $\text{Fe}_3\text{C}$  interface taken along the  
 188  $[011]_{\alpha'}$  zone axis, with the inset showing the corresponding FFT pattern. (g, h) Magnified views of  
 189 marked areas in (e), showing the atomic configurations of (g)  $\alpha'$ -matrix and (h)  $\omega'$ - $\text{Fe}_3\text{C}$ .

190



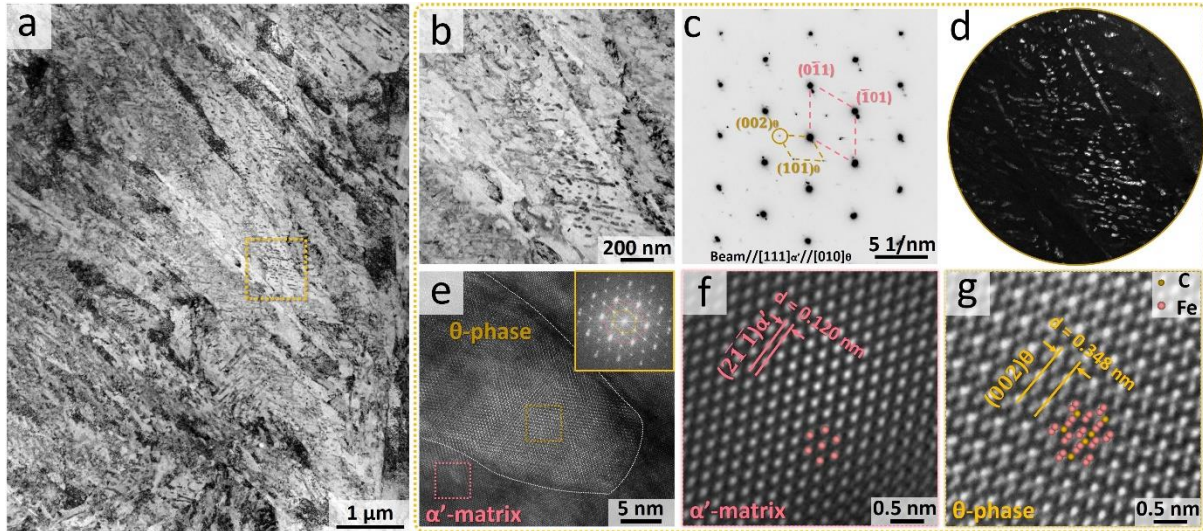

191

192 **Supplementary Figure 8:** TEM characterization of the low-energy-produced 1080 steel ( $69 \text{ J/mm}^3$ )  
 193 after tempering at  $350 \text{ }^\circ\text{C}$  for 2 hours. (a) Bright-field TEM micrograph showing the lath martensite  
 194 microstructure in this sample. (b) The higher magnified TEM image of the areas marked in (a), taken  
 195 close to the  $[111]_{\alpha'}$  zone axis, showing the nano-sized carbides in a single  $\alpha'$ -lath. (c) The associated  
 196 diffraction pattern of (b), with the electron beam aligned along the  $[111]_{\alpha'}$  axis. (d) Dark-field TEM  
 197 images taken from the diffraction spot marked in (c), showing needle or particulate morphologies of  
 198 the carbides. (e) High-resolution TEM images of the  $\alpha'$ -Fe/carbide interface taken along the  $[111]_{\alpha'}$   
 199 zone axis, with the inset showing the corresponding FFT pattern. (f, g) Magnified views of marked  
 200 areas in (e), showing the atomic configurations of the (f)  $\alpha'$ -matrix and (g)  $\theta\text{-Fe}_3\text{C}$ .

201 **Supplementary Section 8. Effect of tempering on the mechanical properties of 3D-printed**  
 202 **plain carbon steels**

203 To further elucidate the impact of tempering on the tensile properties and Charpy impact toughness  
 204 of 3D-printed plain carbon steels, the as-printed samples were subjected to a direct tempering at  $300 \text{ }^\circ\text{C}$ ,  
 205  $350 \text{ }^\circ\text{C}$  and  $400 \text{ }^\circ\text{C}$  for 2 hours. Supplementary Fig. 9 displays engineering stress-strain curves of the  
 206 3D-printed 1080 and 1040 steels at different tempering conditions. The determined yield strength (YS),  
 207 ultimate tensile strength (UTS), elongation to fracture (El) and impact toughness are summarized in  
 208 Supplementary Table 3. It is evident that the mechanical properties of 1080 steel are markedly affected  
 209 by tempering when produced with a low-energy input (i.e. martensite prevails). The low-energy-  
 210 produced 1080 steel achieves a high UTS of  $1976 \text{ MPa}$ , but paralleled by its limited uniform plastic  
 211 deformation with an overall El of only  $3.5\%$  and low impact energy of  $6 \text{ J}$ . Such brittleness also creates  
 212 challenge in precise determination of the yield strength (YS) from the stress-strain curves. This  
 213 observation indicates that despite the in-situ tempering effect from the cyclical thermal nature of the  
 214 layer-wise 3D-printing, the embrittlement nature of high-carbon martensite (as proved by Fig. 2 in the  
 215 main text) cannot be completely mitigated. Such embrittlement arises from its highly supersaturated  
 216 solid solution, significant internal stresses and a high density of dislocations and twins<sup>18</sup>.

217 A low-temperature tempering at  $300 \text{ }^\circ\text{C}$  reduces this embrittlement, improving the El to  $5.5\%$  and  
 218 the impact toughness to  $8 \text{ J}$ . The stress-strain curve shown in Supplementary Fig. 9b also confirms the  
 219 presence of necking, indicating a transition towards ductile fracture. It is noteworthy that the low-  
 220 temperature tempering substantially enhances the ductility without sacrifice the strength of the 1080  
 221 steel, evidenced by its high YS of  $1733 \text{ MPa}$  and UTS of  $1983 \text{ MPa}$ . This seems to be controversial to  
 222 traditional wisdom that tempering commonly softens martensite<sup>18</sup>. This paradox can be understood by  
 223 the concurrent processes of tempering-induced recovery and strengthening. During tempering,  
 224 martensite softening occurs through processes such as detwinning, dislocation annihilation, and carbide

225 desaturation, whilst strengthening is induced by dislocation rearrangement into low-angle cell  
 226 boundaries and precipitation of finely distributed carbides that pin dislocations and impede plastic  
 227 deformation<sup>18,24,25</sup>. For the present 1080 steel, tempering at 300 °C led to a partially tempered  
 228 microstructure (Supplementary Fig. 7), which is likely to create a dominance of strengthening over  
 229 recovery, thus attenuating the brittleness of martensite while maintaining the strength.

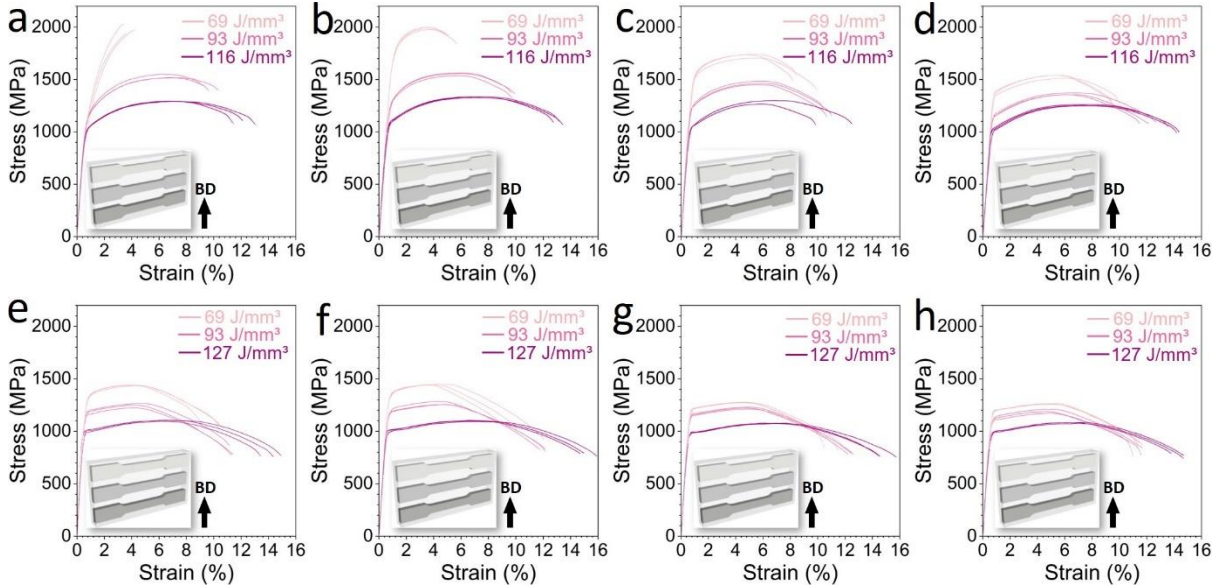

230  
 231 **Supplementary Figure 9:** Typical engineering tensile stress-strain curves of the 3D-printed (a-d) 1080  
 232 steels and (e-h) 1040 steels at (a, e) as-printed condition, and after tempering for 2 hours at (b, f) 300 °C,  
 233 (c, g) 350 °C and (d, h) 400 °C, with insets and arrows showing the sample sectioning orientation and  
 234 building direction (BD), respectively. Source data are provided as a Source Data file.

235 Increasing the tempering temperature to 350 °C led to complete detwinning and formation of a  
 236 high fraction of nano-sized carbides within  $\alpha'$ -laths, signifying a fully tempered microstructure  
 237 (Supplementary Fig. 8). The fully tempered  $\alpha'$  laths interspersed with nano-sized carbides offer  
 238 enhanced cracking resistance and preserve strength. Thus, a more harmonized strength-ductility-  
 239 toughness synergy was achieved in this sample, showing a YS of 1533 MPa, UTS of 1726 MPa, El of  
 240 ~10% and impact toughness of 11 J. Further increasing the tempering temperature to 400 °C led to a  
 241 further decrease in strength and improvements in ductility and impact toughness, signifying an  
 242 enhanced the recovery process at higher temperature.

243 In contrast, tempering treatments exert a limited impact on 3D-printed 1080 steels produced with  
 244 medium or high energy inputs where bainite prevails (as proved by Fig. 2 in the main text). As shown  
 245 in Supplementary Fig. 9b, tempering at 300 °C induces marginal changes to the mechanical behaviour  
 246 of the medium-energy-produced sample. Increasing the tempering temperature to 400 °C slightly  
 247 softens the steel, characterized by a strength reduction of approximately 150 MPa, whereas it increases  
 248 ductility to 12%, and impact toughness to 20 J. The high-energy-produced sample, characterized by a  
 249 bainite-dominant microstructure, showed an even more pronounced resistance to tempering. As  
 250 depicted in Supplementary Figs. 9b-d and Supplementary Table 3, tempering between 300 °C to 400 °C  
 251 results in negligible alterations in the strength, ductility and impact toughness of these samples.

252 Unlike the 1080 steel, the 1040 steel exhibits harmonized strength-ductility-toughness synergy  
 253 directly after 3D-printing (Supplementary Fig. 9e). Tempering has a limited impact on the mechanical  
 254 properties of 3D-printed 1040 steels, where bainite prevails at all selected energy inputs (as proved by  
 255 Fig. 3 in the main text). As shown in Supplementary Figs. 9f-h and Supplementary Table 3, tempering  
 256 at higher temperatures (350-400 °C) slightly reduces the strength of the sample produced with low  
 257 energy input, yet its ductility and impact toughness are preserved. Such a slight softening may be

258 attributed to tempering of the small fraction of martensite present in this sample (as proved by Fig. 3 in  
 259 the main text). However, for all other samples, tempering within the range of 300-400 °C marginally  
 260 affects the mechanical properties, regardless of the energy input used.

261 **Supplementary Table 3: Mechanical properties of 3D-printed plain carbon steels at different heat-**  
 262 **treated conditions**

| Dominant phase                          | Condition  | YS (MPa)  | UTS (MPa)  | El (%)     | Impact toughness |
|-----------------------------------------|------------|-----------|------------|------------|------------------|
| <b>3D-printed 1080</b>                  |            |           |            |            |                  |
| Martensitic dominance (low <i>E</i> )   | As-printed | -         | 1976 ± 48  | 3.5 ± 0.4  | 6 ± 1            |
|                                         | T300 °C    | 1733 ± 15 | 1983 ± 15  | 5.5 ± 0.4  | 8 ± 1            |
|                                         | T350 °C    | 1533 ± 15 | 1726 ± 22  | 9.2 ± 0.9  | 11 ± 1           |
|                                         | T400 °C    | 1363 ± 25 | 1530 ± 17  | 9.7 ± 0.4  | 12 ± 1           |
| Martensite & bainite (medium <i>E</i> ) | As-printed | 1140 ± 17 | 1527 ± 20  | 9.7 ± 0.6  | 13 ± 1           |
|                                         | T300 °C    | 1247 ± 38 | 1553 ± 15  | 9.8 ± 0.2  | 15 ± 1           |
|                                         | T350 °C    | 1223 ± 15 | 1463 ± 15  | 10.7 ± 0.3 | 18 ± 0           |
|                                         | T400 °C    | 1150 ± 10 | 1358 ± 10  | 12.1 ± 0.6 | 20 ± 1           |
| Bainitic dominance (high <i>E</i> )     | As-printed | 1025 ± 3  | 1292 ± 1.5 | 12.3 ± 0.8 | 22 ± 0           |
|                                         | T300 °C    | 1093 ± 12 | 1328 ± 5   | 13.1 ± 0.3 | 21 ± 2           |
|                                         | T350 °C    | 1041 ± 2  | 1279 ± 23  | 11.2 ± 1.8 | 21 ± 2           |
|                                         | T400 °C    | 1040 ± 10 | 1254 ± 6   | 14.1 ± 0.5 | 23 ± 2           |
| <b>3D-printed 1040</b>                  |            |           |            |            |                  |
| Martensite & bainite (low <i>E</i> )    | As-printed | 1335 ± 5  | 1430 ± 5   | 10.2 ± 0.9 | 30 ± 1           |
|                                         | T300 °C    | 1350 ± 10 | 1445 ± 5   | 10.3 ± 1.5 | 31 ± 2           |
|                                         | T350 °C    | 1193 ± 6  | 1271 ± 4   | 11.2 ± 0.7 | 34 ± 2           |
|                                         | T400 °C    | 1175 ± 11 | 1253 ± 6   | 11.5 ± 0.2 | 37 ± 2           |
| Bainitic dominance (medium <i>E</i> )   | As-printed | 1177 ± 15 | 1247 ± 25  | 11.3 ± 0.1 | 76 ± 2           |
|                                         | T300 °C    | 1182 ± 16 | 1264 ± 21  | 12.0 ± 0.2 | 80 ± 1           |
|                                         | T350 °C    | 1133 ± 15 | 1219 ± 9   | 12.4 ± 0.2 | 80 ± 2           |
|                                         | T400 °C    | 1092 ± 19 | 1189 ± 17  | 11.5 ± 0.3 | 78 ± 7           |
| Complete bainite (high <i>E</i> )       | As-printed | 1000 ± 7  | 1100 ± 7   | 14.3 ± 0.8 | 106 ± 5          |
|                                         | T300 °C    | 1003 ± 11 | 1103 ± 7   | 15.3 ± 0.7 | 111 ± 1          |
|                                         | T350 °C    | 975 ± 5   | 1071 ± 4   | 15.0 ± 0.7 | 112 ± 1          |
|                                         | T400 °C    | 965 ± 5   | 1072 ± 8   | 14.5 ± 0.6 | 109 ± 2          |

263

264 This result underscores substantial tempering resistance of bainite compared to martensite in 3D-  
 265 printed plain carbon steels. The remarkable strength of the martensitic 1080 steel arises from nano-twin  
 266 boundaries and carbon supersaturated solid solution within the martensitic ferrite (as proved by Fig. 2  
 267 in the main text)<sup>18,26</sup>. Accordingly, its strength declines sharply with the progression of detwinning and  
 268 carbon desaturation during tempering. In contrast, the tempering resistance of bainite can be attributed  
 269 to the bainitic feature in plain carbon steels and the 3D-printing process. Bainitic transformation  
 270 inherently involves auto-tempering, where majority of carbon solute precipitates as carbides or  
 271 partitions from bainitic ferrite<sup>27</sup>. On the other hand, tempering response of bainitic steels is primarily  
 272 influenced by the decomposition of retained austenite into ferrite and carbide<sup>28</sup>. However, as confirmed  
 273 by our TEM observation (Fig. 3 in main text and Supplementary Fig. 5), the plainified composition  
 274 leads to the absence of retained austenite after bainite transformation in both 3D-printed 1080 and 1040  
 275 steels, diverging from most alloy steels where retained austenite commonly exists. Furthermore, the  
 276 cyclical thermal nature of the layer-wise 3D-printing induces in-situ tempering, rendering the as-printed  
 277 bainite in a condition akin to low-temperature tempering, as opposed to the “fresh” bainite obtained via

278 conventional quenching. Thus, it is not surprising that the post tempering response is rather insensitive  
 279 in the sample. This feature accentuates the convenience and efficacy of 3D-printing for fabricating  
 280 bainitic plain carbon steels, particularly the 1040 steel, obviating the need for subsequent heat treatment.

281 **Supplementary Section 9. Evaluation of the anisotropy in mechanical properties**

282 To further assess property anisotropy in the 3D-printed plain carbon steels, additional tensile tests  
 283 were conducted along the vertical direction (i.e., the build direction) on the 1040 steel. Supplementary  
 284 Fig. 10 compares the engineering stress-strain curves of the as-printed 1040 steels in both vertical and  
 285 horizontal directions. The determined YS, UTS, El, and the corresponding calculated anisotropy ratios  
 286 are summarized in Supplementary Table 4. Except for a moderate anisotropy observed in the low-  
 287 energy-produced samples, the samples produced with medium and high energy inputs exhibited  
 288 marginal anisotropy in the tensile properties. This result demonstrates that microstructural refinement  
 289 through martensitic and/or bainitic phase transformations reduced the anisotropy, effectively addressing  
 290 the common issue of columnar structures in 3D-printed alloys.

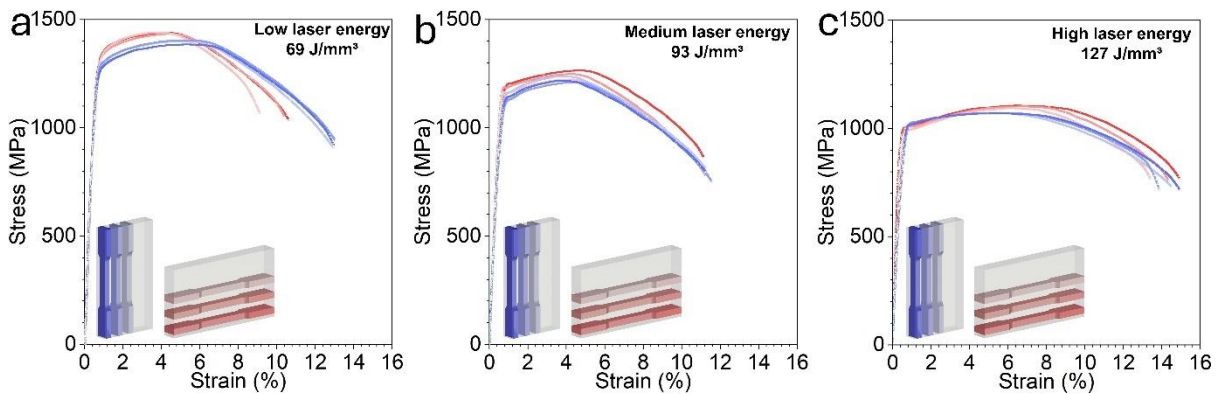

291 **Supplementary Figure 10:** Representative engineering tensile stress-strain curve of the 3D-printed  
 292 1040 steel with (a) low laser energy of  $69 \text{ J/mm}^3$ , (b) medium laser energy of  $93 \text{ J/mm}^3$  and high laser  
 293 energy of  $127 \text{ J/mm}^3$  along both horizontal and vertical directions. Source data are provided as a Source  
 294 Data file.  
 295

296 **Supplementary Table 4:** Mechanical properties of 3D-printed 1040 steels in different directions, with  
 297 calculated anisotropy ratios. Note that anisotropy ratios were not calculated when property variations  
 298 fell within the error margins.

| Dominant phase                   | Direction        | YS (MPa)<br>Anisotropy ratio (%) | UTS (MPa)<br>Anisotropy ratio (%) | El (%)<br>Anisotropy ratio (%) |
|----------------------------------|------------------|----------------------------------|-----------------------------------|--------------------------------|
| Martensite & bainite (low $E$ )  | Horizontal       | $1335 \pm 5$                     | $1430 \pm 5$                      | $10.2 \pm 0.9$                 |
|                                  | Vertical         | $1267 \pm 15$                    | $1397 \pm 10$                     | $12.9 \pm 0.2$                 |
|                                  | Anisotropy ratio | -5%                              | -2%                               | +26%                           |
| Bainitic dominance (medium $E$ ) | Horizontal       | $1177 \pm 15$                    | $1247 \pm 25$                     | $11.3 \pm 0.1$                 |
|                                  | Vertical         | $1125 \pm 23$                    | $1223 \pm 16$                     | $11.5 \pm 0.1$                 |
|                                  | Anisotropy ratio | -4%                              | -                                 | -                              |
| Complete bainite (high $E$ )     | Horizontal       | $1000 \pm 7$                     | $1100 \pm 7$                      | $14.3 \pm 0.8$                 |
|                                  | Vertical         | $992 \pm 10$                     | $1070 \pm 2$                      | $14.4 \pm 0.6$                 |
|                                  | Anisotropy ratio | -                                | -3%                               | -                              |

299  
 300  
 301

302 **Supplementary Section 10. Powder feedstock**

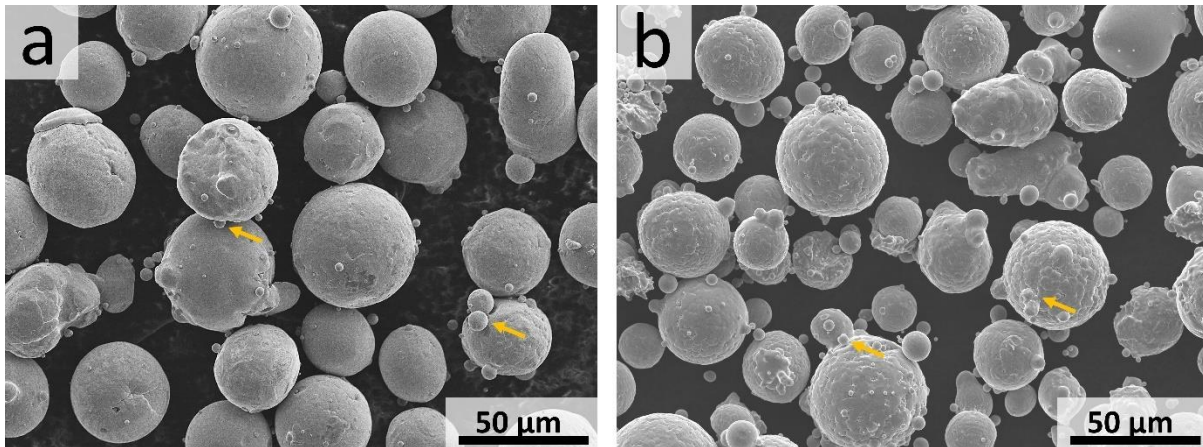

303  
304 **Supplementary Figure 11:** Powder morphology of (a) pure iron and (b) AISI 1080 steel, with arrows  
305 indicating small satellites attached to the surface of the spherical powders.

306 **Supplementary References**

- 307 1. Simchi, A. Direct laser sintering of metal powders: Mechanism, kinetics and microstructural  
308 features. *Materials Science and Engineering: A* **428**, 148-158 (2006).
- 309 2. Tan, Q. et al. Effect of processing parameters on the densification of an additively manufactured  
310 2024 Al alloy. *J. Mater. Sci. Technol.* **58**, 34-45 (2020).
- 311 3. DebRoy, T. et al. Additive manufacturing of metallic components – Process, structure and  
312 properties. *Prog. Mater. Sci.* **92**, 112-224 (2018).
- 313 4. Sun, D. et al. Optimization scheme of the orientation relationship from crystallographic  
314 statistics of variants and its application to lath martensite. *Mater. Des.* **195**, 109022 (2020).
- 315 5. Ping, D. H. et al. A transition of  $\omega$ -Fe<sub>3</sub>C  $\rightarrow$   $\omega'$ -Fe<sub>3</sub>C  $\rightarrow$   $\theta'$ -Fe<sub>3</sub>C in Fe-C martensite. *Sci. Rep.*  
316 **10**, 6081 (2020).
- 317 6. Ikeda, Y. et al.  $\omega$  structure in steel: A first-principles study. *J. Alloys and Compd.* **684**, 624-627  
318 (2016).
- 319 7. Chen, Y. et al. An atomic mechanism for the formation of nanotwins in high carbon martensite.  
320 *J. Alloys and Compd.* **767**, 68-72 (2018).
- 321 8. Huang, X. et al. Crystallography and morphology of cementite precipitates formed during rapid  
322 solidification of a ferritic stainless steel. *Acta Mater.* **48**, 4073-4082 (2000).
- 323 9. Zhong, N. et al. Orientation Relationships between Ferrite and Cementite by Edge-to-edge  
324 Matching Principle. *J. Mater. Sci. Technol.* **27**, 475-480 (2011).
- 325 10. Drillet, J. et al. Nanometric Scale Investigation of Phase Transformations in Advanced Steels  
326 for Automotive Application. *Metall. Mater. Trans. A* **43**, 4947-4956 (2012).
- 327 11. Zhang, M.X. et al. Accurate Orientation Relationships Between Ferrite and Cementite in  
328 Pearlite. *Scr. Mater.* **37**, 2009-2015 (1997).
- 329 12. Bagaryatskii, Y. A. *The probable mechanism of the martensite decomposition.* (H. Brucher  
330 Technical Translations, 1950).
- 331 13. Liu, T. et al. TEM and electron diffraction analysis of  $\omega$ -Fe to cementite transformation in  
332 quenched and tempered high carbon steels. *AIP Advances* **9**, 045219 (2019).
- 333 14. Kumar, A. et al. Mechanical properties of nanostructured bainitic steels. *Materialia* **15**, 101034  
334 (2021).
- 335 15. Bhadeshia, H. Nanostructured bainite. *Proceedings of the Royal Society A: Mathematical,*  
336 *Physical and Engineering Sciences* **466**, 3-18 (2010).
- 337 16. Kumar, A. et al. Compositional design of high strength nanostructured bainite. *Mater. Res.*  
338 *Express* **6**, 026526 (2018).
- 339 17. Kumar, A. et al. Toughness dependence of nano-bainite on phase fraction and morphology.  
340 *Mater. Sci. Eng. A* **729**, 439-443 (2018).

- 341 18. Callister Jr, W. D. et al. *Materials science and engineering an introduction*. (John Wiley &  
342 Sons, 2007).
- 343 19. Ping, D. H. et al. Metastable  $\omega'$ -Fe<sub>3</sub>C carbide formed during  $\omega$ -Fe<sub>3</sub>C particle coarsening in  
344 binary Fe-C alloys. *J. Appl. Phys.* **125**, 175112 (2019).
- 345 20. Ping, D.H. et al. Formation of  $\theta$ -Fe<sub>3</sub>C Cementite via  $\theta'$ -Fe<sub>3</sub>C ( $\omega$ -Fe<sub>3</sub>C) in Fe–C Alloys. *Cryst.*  
346 *Growth Des.* **21**, 1683-1688 (2021).
- 347 21. Shang, Z. et al. Tailoring the strength and ductility of T91 steel by partial tempering treatment.  
348 *Acta Mater.* **169**, 209-224 (2019).
- 349 22. Ping, D. H. et al. Lath formation mechanisms and twinning as lath martensite substructures in  
350 an ultra low-carbon iron alloy. *Sci. Rep.* **8**, 14264 (2018).
- 351 23. Shah, M. et al. Wear Mechanism of High Chromium White Cast Iron and Its Microstructural  
352 Evolutions During the Comminution Process. *Tribol. Lett.* **68**, 77 (2020).
- 353 24. Dannoshita, H. et al. Evolution of dislocation structure determined by neutron diffraction line  
354 profile analysis during tensile deformation in quenched and tempered martensitic steels. *Mater.*  
355 *Sci. Eng. A* **854**, 143795 (2022).
- 356 25. Saastamoinen, A. et al. Direct-quenched and tempered low-C high-strength structural steel: The  
357 role of chemical composition on microstructure and mechanical properties. *Mater. Sci. Eng. A*  
358 **760**, 346-358 (2019).
- 359 26. Bhadeshia, H. et al. *Steels: microstructure and properties*. (Butterworth-Heinemann, 2017).
- 360 27. Caballero, F. G. et al. Very strong bainite. *Curr. Opin. Solid State Mater. Sci.* **8**, 251-257 (2004).
- 361 28. Kang, J. et al. Effect of tempering on the microstructure and mechanical properties of a medium  
362 carbon bainitic steel. *Mater. Sci. Eng. A* **686**, 150-159 (2017).
